# Supplementary material for: The Novel Internalins InlP1 and InlP4 and the Internalin-Like Protein InlP3 Enhance the Pathogenicity of Listeria monocytogenes
Source: Front Microbiol. 2019 Jul 23;10:1644. doi: 10.3389/fmicb.2019.01644 (PMC6664051; doi:10.3389/fmicb.2019.01644)
Supplement: Supplementary file 5 [file Table_2.xlsx]

## Sheet: Table S2
Table S2: Strain characteristics, location, sequence coverage and nucleotide identity of inlP1, inlP2, inlP3, inlPq and inlP4
#	strain ID	alternative strain name	source	isolation year	country	ST	CC	lineage	location	lmo2025-lmo2028 hotspot	inlP1		inlP2			inlP3		inlPq		inlP4
											coverage	identity	coverage	identity	feature	coverage	identity	coverage	identity	coverage	identity
1	QOC1		human	2010	Austria	403	403	II	chromosome	yes	100	100	100	100	truncated	100	100	100	100	100	100
2	A522		food	1991	Canada	19	19	II	chromosome	inlP4 and lmo2025 on one contig, lmo2026 at the end of contig	-	-	-	-		-	-	-	-	89	95.12
3	BCW_3917		unknown	unknown	unknown	378	19	II	chromosome	inlP4 on one contig, lmo2025 and lmo2026 at the end of contig	-	-	-	-		-	-	-	-	85	99.88
4	CFSAN046005	IZS186, 112051	smoked salmon	2011	Italy	19	19	II	chromosome	genes on two contigs, lmo2025 and lmo2026 at the end of contigs	100	99.47	100	100	truncated	82	99.70	100	99.37	52	81.96
5	FSL J1-208		caprine		USA	569	ST569	IV	plasmid	genes on plasmid pLMIV	100	91.74	96	94	full lenght	100	96.32	70	96.66	99	86.34
6	L2074		human	2010	USA	378	19	II	chromosome	yes	-	-	-	-		-	-	-	-	100	99.91
7	LM83088	CLIP 83088	human	2000	France	19	19	II	chromosome	genes on one contig, lmo2025 and lmo2026 at the end of contigs	66	99.70	100	100	truncated	100	99.75	100	99.37	16	99.73
8	LM-F52		food	2010	Canada	19	19	II	chromosome	yes	-	-	-	-		-	-	-	-	89	99.31
9	LM-F82		food	2010	Canada	19	19	II	chromosome	inlP4 and lmo2025 on one contig, lmo2026 at the end of contig	-	-	-	-		-	-	-	-	89	97.06
10	LM-F83		food	2010	Canada	19	19	II	chromosome	inlP4 and lmo2025 on one contig, lmo2026 at the end of contig	-	-	-	-		-	-	-	-	81	99.32
11	NRRL B-33014	12443; BCW_3811	monkey placenta	unknown	unknown	1065	ST1065	II	chromosome	genes on one contig, lmo2025 and lmo2026 at the end of contigs	100	98.51	100	100	truncated	100	99.67	100	99.37	80	86.10
12	NRRL B-33387	LMB471; BCW_3864	bovine	1986	USA	556	ST556	II	chromosome	genes on one contig, lmo2025 and lmo2026 at the end of contigs	100	99.86	100	100	truncated	100	99.75	100	99.37	89	97.05
13	NRRL B-33568	J.3560; BCW_3876	human	2005	USA	796	193	II	chromosome	genes on two contigs, lmo2025 and lmo2026 at the end of contigs	100	99.86	100	100	truncated	100	99.72	100	99.49	98	99.88
14	OCF61		food processing environment	2013	Canada	19	19	II	chromosome	inlP4 and lmo2025 on one contig, lmo2026 at the end of contig	-	-	-	-		-	-	-	-	89	95.12
15	SLCC2540	CIP78.35, CDL231	human	1956	USA	617	344	I	chromosome	yes	100	95.34	100	94.00	full lenght	100	96.19	100	96.35	48	87.98
